# Supplementary material for: Hydrogel and neural progenitor cell delivery supports organotypic fetal spinal cord development in an ex vivo model of prenatal spina bifida repair
Source: PubMed Central journal article supplement — J Tissue Eng. 2020 Jul 24;11:2041731420943833. doi: 10.1177/2041731420943833 (PMC7383650; doi:10.1177/2041731420943833), 2020-07-24
Supplement: BIANCOTTI_Supplemental_Table_1.pdf [file BIANCOTTI_Supplemental_Table_1.pdf]

**Supplemental Table. qPCR Primer Sequences**

| <b>Gene</b>         | <b>Forward (5' to 3')</b> | <b>Reverse (5' to 3')</b> |
|---------------------|---------------------------|---------------------------|
| <b><i>GAPDH</i></b> | CTCTGCTCCTCCTGTTG AC      | TTAAAAGCAGCCCTGGTGAC      |
| <b><i>PAX6</i></b>  | CTTCGCTAATGGGCCAGTGA      | TCAGATTCCTATGCTGATTGGTGA  |
| <b><i>NES</i></b>   | TTCCCTCAGCTTTCAGGACCC     | GGACTGGGAGCAAAGATCCAA     |
| <b><i>TUBB3</i></b> | GGGCGAGATGTACGAAGACG      | CTCCGGGGGTTTAGACACTG      |
| <b><i>MAP2</i></b>  | GCTCCCGGAGAAGGATTCTG      | CAAGCTGAAGAATCAGCGCA      |
| <b><i>OLIG2</i></b> | ATAGATCGACGCGACACCAG      | ACCCGAAAATCTGGATGCGA      |
| <b><i>GFAP</i></b>  | AGAACCGGATCACCATTCCC      | CCTCTTGAGGTGGCCTTCTG      |
| <b><i>BDNF</i></b>  | ATGATGGTCCTGCCAC          | CAGTCTTTTTGTCTGCCGCC      |
| <b><i>NTF3</i></b>  | AACGCGATGTAAGGAAGCCA      | AGTGCTCGGACGTAGGTTTG      |
